# Supplementary material for: Widespread and persistent invasions of terrestrial habitats coincident with larval feeding behavior transitions during snail-killing fly evolution (Diptera: Sciomyzidae)
Source: PubMed Central journal article supplement (PMC3483186; doi:10.1186/1471-2148-12-175), 2012-09-10
Supplement: 1471-2148-12-175-S1.pdf [file 1471-2148-12-175-S1.pdf]

Table S1. Gene information and evolutionary models selected by jModelTest for BI and ML phylogenetic analyses.

| Gene region                           | Genome: Gene Type  | Position in data set | Evolutionary Model |
|---------------------------------------|--------------------|----------------------|--------------------|
| COI 1 <sup>st</sup> position          | Mt: Protein-Coding | 2-1474\3             | HKY+I+G            |
| COI 2 <sup>nd</sup> position          | Mt: Protein-Coding | 3-1474\3             | HKY+I+G            |
| COI 3 <sup>rd</sup> position          | Mt: Protein-Coding | 1-1474\3             | K80+I+G            |
| COII 1 <sup>st</sup> position         | Mt: Protein-Coding | 1475-2155\3          | GTR+G              |
| COII 2 <sup>nd</sup> position         | Mt: Protein-Coding | 1476-2155\3          | GTR+G              |
| COII 3 <sup>rd</sup> position         | Mt: Protein-Coding | 1477-2155\3          | HKY+G              |
| 16S                                   | Mt: Ribosomal      | 3251-3676            | HKY+I+G            |
| 28S                                   | Nu: Ribosomal      | 2156-3250            | GTR+I+G            |
| Ef1 $\alpha$ 1 <sup>st</sup> position | Nu: Protein-Coding | 3679-4552\3          | HKY+G              |
| Ef1 $\alpha$ 2 <sup>nd</sup> position | Nu: Protein-Coding | 3677-4552\3          | JC+I               |
| Ef1 $\alpha$ 3 <sup>rd</sup> position | Nu: Protein-Coding | 3678-4552\3          | GTR+G              |
